# Supplementary material for: Factors associated with high-risk human papillomavirus infection and high-grade cervical neoplasia: A population-based study in Paraguay
Source: PubMed Central journal article supplement (PMC6597051; doi:10.1371/journal.pone.0218016), 2019-06-27
Supplement: pone.0218016.s004.pdf [file pone.0218016.s004.pdf]

# DATOS SOCIO DEMOGRÁFICOS ESTAMPA

Código de barras  
participante

|                                                                                                                                                                                                                                                                                                                                                                                                                                                                                                                                                                                                                                                                                                                                                                                                                                                                                                                                                                            |                                                                                           |
|----------------------------------------------------------------------------------------------------------------------------------------------------------------------------------------------------------------------------------------------------------------------------------------------------------------------------------------------------------------------------------------------------------------------------------------------------------------------------------------------------------------------------------------------------------------------------------------------------------------------------------------------------------------------------------------------------------------------------------------------------------------------------------------------------------------------------------------------------------------------------------------------------------------------------------------------------------------------------|-------------------------------------------------------------------------------------------|
| <b>Fecha de visita:</b>  _ _ / _ _ / _ _ _ _ <br><small style="display: flex; justify-content: space-around; font-size: 8px;">Día      Mes      Año</small>                                                                                                                                                                                                                                                                                                                                                                                                                                                                                                                                                                                                                                                                                                                                                                                                                | <b>Clínica:</b>  _ _                                                                      |
| <b>Deseo tomar algunos minutos para hacerle algunas preguntas acerca de su educación y trabajo</b>                                                                                                                                                                                                                                                                                                                                                                                                                                                                                                                                                                                                                                                                                                                                                                                                                                                                         |                                                                                           |
| 1. <b>¿Sabe leer?</b>                                                                                                                                                                                                                                                                                                                                                                                                                                                                                                                                                                                                                                                                                                                                                                                                                                                                                                                                                      | 1 Sí    2 No    9 NR <input style="float: right;" type="checkbox"/>                       |
| 2. <b>¿Sabe escribir?</b>                                                                                                                                                                                                                                                                                                                                                                                                                                                                                                                                                                                                                                                                                                                                                                                                                                                                                                                                                  | 1 Sí    2 No    9 NR <input style="float: right;" type="checkbox"/>                       |
| 3. <b>¿Ha asistido alguna vez a la escuela?</b>                                                                                                                                                                                                                                                                                                                                                                                                                                                                                                                                                                                                                                                                                                                                                                                                                                                                                                                            | 1 Sí    2 No (pase a 5)    9 NR (pase a 5) <input style="float: right;" type="checkbox"/> |
| <b>4. ¿Cuál fue el grado o nivel de escolaridad más alto que completó?</b><br><br><div style="display: flex; justify-content: space-between;"> <div style="width: 45%;">           1 Primaria incompleta<br/>           2 Primaria completa<br/>           3 Secundaria incompleta<br/>           4 Secundaria completa         </div> <div style="width: 45%;">           5 Pregrado/universidad incompleta<br/>           6 Pregrado/universidad completa<br/>           7 Vocacional/técnica<br/>           9 NR/NS         </div> </div>                                                                                                                                                                                                                                                                                                                                                                                                                               | <input type="checkbox"/>                                                                  |
| <b>5. ¿Cuáles de las siguientes descripciones expresa mejor la situación actual del jefe de hogar (jefe de hogar es el que lleva más dinero a la casa)?</b><br><br><div style="display: flex; justify-content: space-between;"> <div style="width: 45%;">           1 Trabaja<br/>           2 Desempleado buscando trabajo<br/>           3 Estudia<br/>           4 Enfermo permanente/discapacitado         </div> <div style="width: 45%;">           5 Retirado<br/>           6 Hace tareas del hogar, cuida a los niños o a otras personas<br/>           7 Otro<br/>           8 Ni trabaja ni busca empleo<br/>           9 NS/NR         </div> </div>                                                                                                                                                                                                                                                                                                           | <input type="checkbox"/>                                                                  |
| <b>6. ¿Cuál es la ocupación del jefe de hogar?</b><br><br><div style="display: flex; justify-content: space-between;"> <div style="width: 45%;">           1 Empleado<br/>           2 Empleado en oficios domésticos<br/>           3 Trabaja en un programa de empleo social<br/>           4 Empleador (con 5 empleados o menos)<br/>           5 Empleador (con más de 5 empleados)<br/>           6 Profesional o técnico trabajando Independiente<br/>           7 Trabajador independiente pero no profesional (en la casa, comerciante, trabajador de la construcción sin contrato formal de trabajo)         </div> <div style="width: 45%;">           8 Trabajo temporal<br/>           9 Trabajo de campo: pastoreo, agricultura, etc...<br/>           10 Trabajador sin salario: trabaja en empresa familiar sin salario<br/>           11 Otro<br/>           12 No responde<br/>           13 Jubilado/a<br/>           14 No aplica         </div> </div> | <input type="checkbox"/> <input type="checkbox"/>                                         |
| <b>7. El agua en su casa:</b><br><br><div style="display: flex; justify-content: space-between;"> <div style="width: 45%;">           1 Llega por tubería a la casa<br/>           2 Está dentro del terreno pero fuera de la casa         </div> <div style="width: 45%;">           3 Está fuera del terreno<br/>           9 No responde         </div> </div>                                                                                                                                                                                                                                                                                                                                                                                                                                                                                                                                                                                                          | <input type="checkbox"/>                                                                  |
| <b>8. ¿Tiene baño?</b><br><br><div style="display: flex; justify-content: space-between;"> <div style="width: 45%;">           1 Sí<br/>           2 No (pase a 10)         </div> <div style="width: 45%;">           9 No responde         </div> </div>                                                                                                                                                                                                                                                                                                                                                                                                                                                                                                                                                                                                                                                                                                                 | <input type="checkbox"/>                                                                  |
